# Supplementary material for: “HerdGPS-Preprocessor”—A Tool to Preprocess Herd Animal GPS Data; Applied to Evaluate Contact Structures in Loose-Housing Horses
Source: MDPI journal article supplement (doi:10.3390/ani10101932), 2020-10-21
Supplement: s1 [file s1]

# Supplementary material to “HerdGPS-Preprocessor” – A tool to preprocess herd animal GPS data; applied to evaluate contact structures in loose-housing horses

J. Salau\*, F. Hildebrandt, I. Czycholl, J. Krieter

\*: Corresponding author

Institute of Animal Breeding and Husbandry, Christian-Albrechts-University Kiel, Olshausenstraße 40, 24098 Kiel

## S.1 Contact networks

Listing S.1: Extract from the contact list for 1st of July 2018

```
"Animal1","Animal2","Square","TimeWindow(60min)"
"19","33","65-57","5"
"30","37","94-65","5"
"9","10","122-62","5"
...
"8","15","57-52","10"
"23","10","56-52","10"
...
"4","21","127-60","17"
"15","23","88-57","17"
"27","6","95-62","17"
...
"24","8","27-43","22"
"5","17","48-38","22"
```

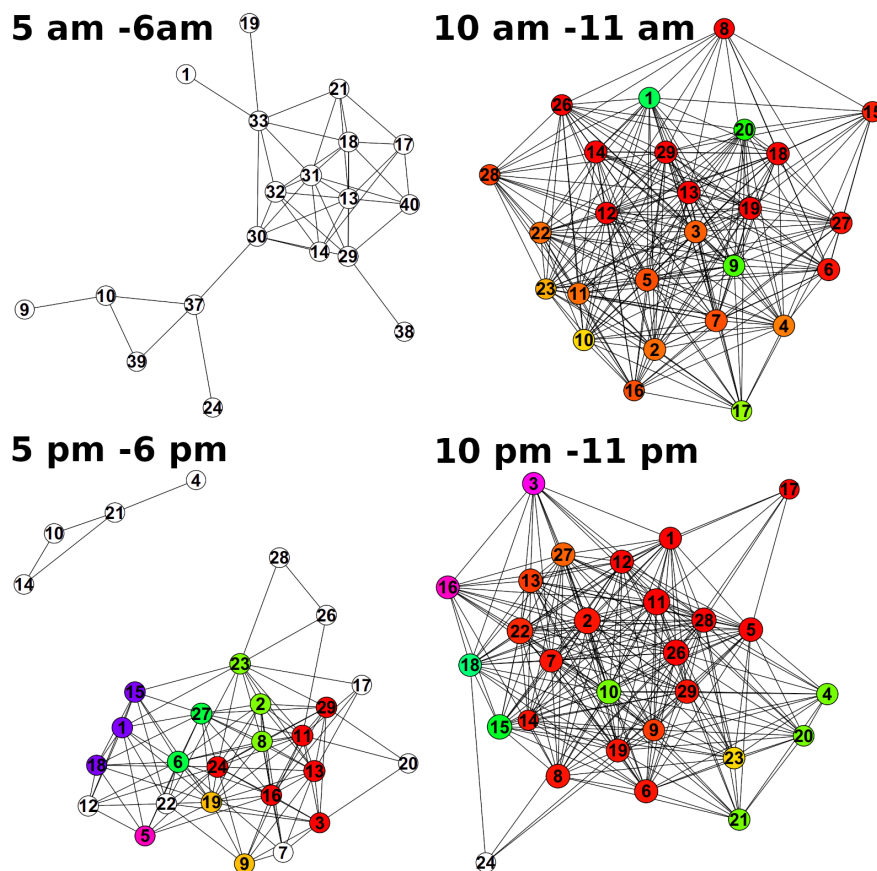

Figure S.1: Plots of the hourly networks corresponding to the extracted contacts in Listing S1. Networks are based on data from 1st of July 2018. Different cliques are coloured differently, whilst nodes belonging to more than one clique are coloured only with regard to the larger clique. White nodes do not belong to any clique.

Table S.1: Clique metrics, diameter and density of the example networks in Figure S.1.

| date       | hour           | cliques $\geq 6$ | largest_clique | diameter | density |
|------------|----------------|------------------|----------------|----------|---------|
| 2018-07-01 | 5 am to 6 am   | 0                | 3              | 5        | 0.20    |
| 2018-07-01 | 10 am to 11 am | 71               | 11             | 3        | 0.65    |
| 2018-07-01 | 5 pm to 6 pm   | 26               | 7              | 3        | 0.41    |
| 2018-07-01 | 10 pm to 11 pm | 27               | 8              | 3        | 0.38    |

## S.2 Clique metrics

In addition to the boxplots presented in Figure 6 in the main article which illustrate the clique metrics grouped by hours, Figures S.2 and S.3 depict the clique metrics grouped by days. The underlying contact networks are based on one hour aggregation windows. The red diamonds mark the means and the red bars represent the mean  $\pm$  standard deviation.

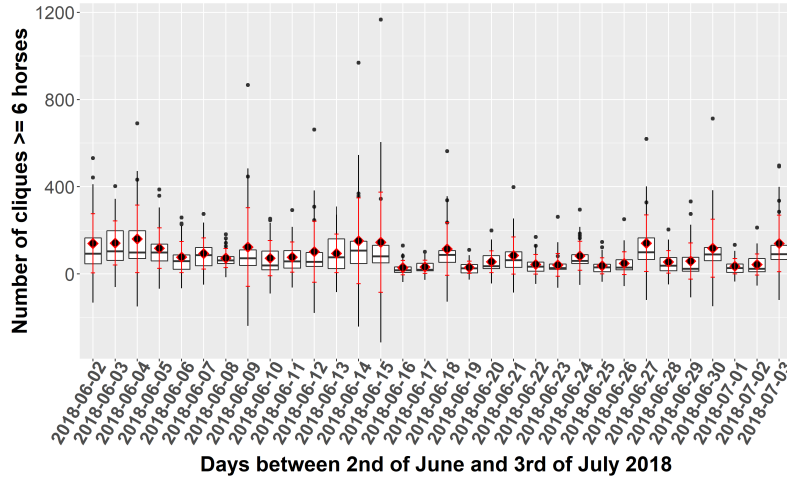

Figure S.2: Boxplot representing the number of cliques with more than six horses grouped by days.

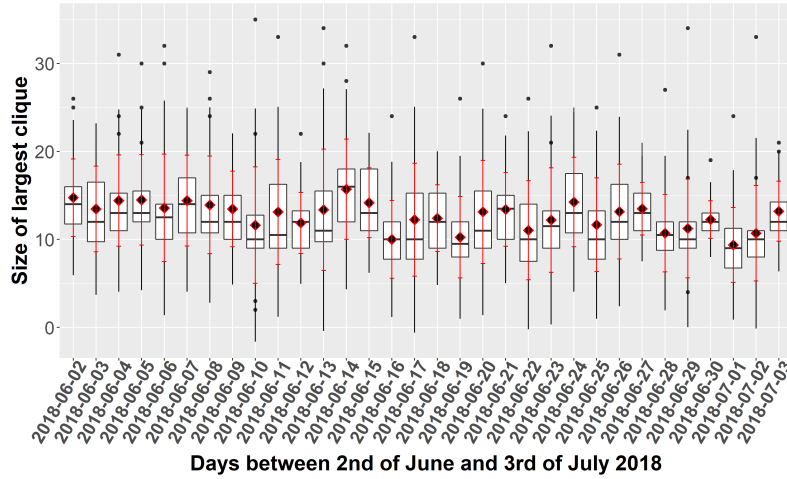

Figure S.3: Boxplot representing the sizes of the largest clique in the network grouped by days.

Figure S.4 presents the course of both clique metrics. As those differ in range, the values were transformed by taking the logarithm of base 10 for the sake of visibility.

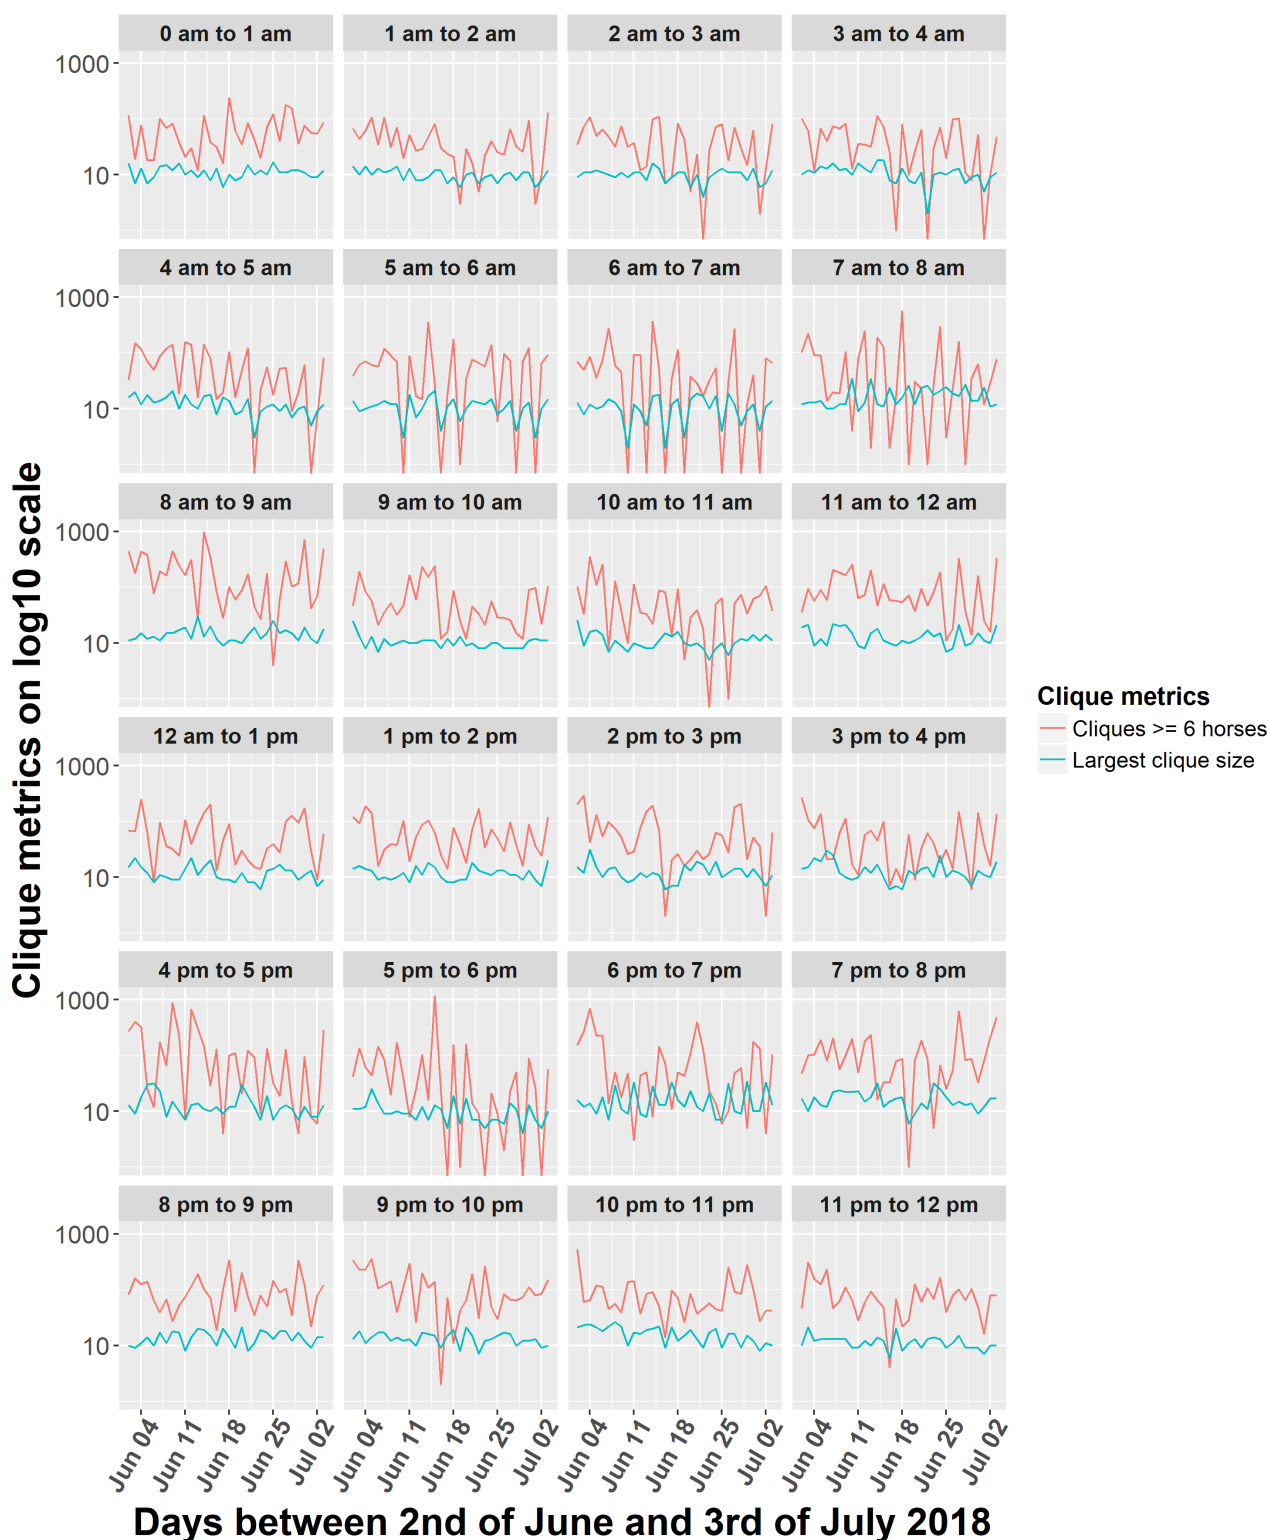

Figure S.4: Number of cliques with more than six horses (red) and size of the largest clique (blue) plotted on a log10 scale for joint presentation.

Tables S.2 and S.3 present p-values from multiple comparisons between different hours of the numbers of cliques with more than six horses, respectively, the sizes of largest cliques. Tables S.4 and S.5 present p-values from multiple comparisons between different days of the clique metrics calculated from the hourly networks. Significant differences ( $p < 0.05$ ) are marked blue. For multiple comparisons a Bonferroni correction was applied.

Table S.2: p-values from multiple comparisons between different hours of the numbers of cliques with more than six horses. Significant differences ( $p < 0.05$ ) are marked blue.

|                | 0am-<br>1 am | 1am-<br>2 am | 2am-<br>3 am | 3am-<br>4 am | 4am-<br>5 am | 5am-<br>6 am | 6am-<br>7 am | 7am-<br>8 am | 8am-<br>9 am | 9am-<br>10am | 10am-<br>11am | 11am-<br>12am | 12am-<br>1pm | 1pm-<br>2pm | 2pm-<br>3pm | 3pm-<br>4pm | 4pm-<br>5pm | 5pm-<br>6pm | 6pm-<br>7pm | 7pm-<br>8pm | 8pm-<br>9pm | 9pm-<br>10pm | 10pm-<br>11pm |
|----------------|--------------|--------------|--------------|--------------|--------------|--------------|--------------|--------------|--------------|--------------|---------------|---------------|--------------|-------------|-------------|-------------|-------------|-------------|-------------|-------------|-------------|--------------|---------------|
| 1am-<br>2 am   | 1            | -            | -            | -            | -            | -            | -            | -            | -            | -            | -             | -             | -            | -           | -           | -           | -           | -           | -           | -           | -           | -            | -             |
| 2am-<br>3 am   | 1            | 1            | -            | -            | -            | -            | -            | -            | -            | -            | -             | -             | -            | -           | -           | -           | -           | -           | -           | -           | -           | -            | -             |
| 3am-<br>4 am   | 1            | 1            | 1            | -            | -            | -            | -            | -            | -            | -            | -             | -             | -            | -           | -           | -           | -           | -           | -           | -           | -           | -            | -             |
| 4am-<br>5 am   | 1            | 1            | 1            | 1            | -            | -            | -            | -            | -            | -            | -             | -             | -            | -           | -           | -           | -           | -           | -           | -           | -           | -            | -             |
| 5am-<br>6 am   | 1            | 1            | 1            | 1            | 1            | -            | -            | -            | -            | -            | -             | -             | -            | -           | -           | -           | -           | -           | -           | -           | -           | -            | -             |
| 6am-<br>7 am   | 1            | 1            | 1            | 1            | 1            | 1            | -            | -            | -            | -            | -             | -             | -            | -           | -           | -           | -           | -           | -           | -           | -           | -            | -             |
| 7am-<br>8 am   | 1            | 1            | 1            | 1            | 1            | 1            | 1            | -            | -            | -            | -             | -             | -            | -           | -           | -           | -           | -           | -           | -           | -           | -            | -             |
| 8am-<br>9 am   | 0.07         | 0            | 0            | 0            | 0.03         | 0.09         | 0.02         | 0.1          | -            | -            | -             | -             | -            | -           | -           | -           | -           | -           | -           | -           | -           | -            | -             |
| 9am-<br>10 am  | 1            | 1            | 1            | 1            | 1            | 1            | 1            | 1            | 0.03         | -            | -             | -             | -            | -           | -           | -           | -           | -           | -           | -           | -           | -            | -             |
| 10am-<br>11 am | 1            | 1            | 1            | 1            | 1            | 1            | 1            | 1            | 0.06         | 1            | -             | -             | -            | -           | -           | -           | -           | -           | -           | -           | -           | -            | -             |
| 11am-<br>12 am | 1            | 0.33         | 0.88         | 1            | 1            | 1            | 1            | 1            | 1            | 1            | -             | -             | -            | -           | -           | -           | -           | -           | -           | -           | -           | -            | -             |
| 12am-<br>1pm   | 1            | 1            | 1            | 1            | 1            | 1            | 1            | 1            | 0.07         | 1            | 1             | -             | -            | -           | -           | -           | -           | -           | -           | -           | -           | -            | -             |
| 1pm-<br>2pm    | 1            | 1            | 1            | 1            | 1            | 1            | 1            | 1            | 0.08         | 1            | 1             | 1             | -            | -           | -           | -           | -           | -           | -           | -           | -           | -            | -             |
| 2pm-<br>3pm    | 1            | 1            | 1            | 1            | 1            | 1            | 1            | 1            | 0.07         | 1            | 1             | 1             | 1            | 1           | -           | -           | -           | -           | -           | -           | -           | -            | -             |
| 3pm-<br>4pm    | 1            | 1            | 1            | 1            | 1            | 1            | 1            | 1            | 0.01         | 1            | 1             | 1             | 1            | 1           | 1           | -           | -           | -           | -           | -           | -           | -            | -             |
| 4pm-<br>5pm    | 1            | 1            | 1            | 1            | 1            | 1            | 1            | 1            | 1            | 1            | 1             | 1             | 1            | 1           | 1           | 1           | -           | -           | -           | -           | -           | -            | -             |
| 5pm-<br>6pm    | 1            | 1            | 1            | 1            | 1            | 1            | 1            | 1            | 0            | 1            | 1             | 1             | 1            | 1           | 1           | 1           | 1           | -           | -           | -           | -           | -            | -             |
| 6pm-<br>7pm    | 1            | 1            | 1            | 1            | 1            | 1            | 1            | 1            | 0.9          | 1            | 1             | 1             | 1            | 1           | 1           | 1           | 1           | 1           | -           | -           | -           | -            | -             |
| 7pm-<br>8pm    | 1            | 0.08         | 0.15         | 0.28         | 1            | 1            | 1            | 1            | 1            | 1            | 1             | 1             | 1            | 1           | 1           | 1           | 1           | 0.76        | 1           | -           | -           | -            | -             |
| 8pm-<br>9pm    | 1            | 0.01         | 0.02         | 0.04         | 1            | 1            | 0.67         | 1            | 1            | 1            | 1             | 1             | 1            | 1           | 1           | 0.58        | 1           | 0.38        | 1           | 1           | -           | -            | -             |
| 9pm-<br>10pm   | 1            | 0.01         | 0.03         | 0.03         | 1            | 1            | 0.59         | 1            | 1            | 1            | 1             | 1             | 1            | 1           | 1           | 0.41        | 1           | 0.18        | 1           | 1           | 1           | -            | -             |
| 10pm-<br>11pm  | 1            | 0.15         | 0.74         | 1            | 1            | 1            | 1            | 1            | 1            | 1            | 1             | 1             | 1            | 1           | 1           | 1           | 1           | 1           | 1           | 1           | 1           | 1            | -             |
| 11pm-<br>12pm  | 1            | 0.26         | 1            | 1            | 1            | 1            | 1            | 1            | 1            | 1            | 1             | 1             | 1            | 1           | 1           | 1           | 1           | 1           | 1           | 1           | 1           | 1            | 1             |

Table S.3: p-values from multiple comparisons between different hours of the sizes of the largest cliques. Significant differences ( $p < 0.05$ ) are marked blue.

|                | 0am-<br>1 am | 1am-<br>2 am | 2am-<br>3 am | 3am-<br>4 am | 4am-<br>5 am | 5am-<br>6 am | 6am-<br>7am | 7am-<br>8 am | 8am-<br>9am | 9am-<br>10am | 10am-<br>11am | 11am-<br>12am | 12am-<br>1pm | 1pm-<br>2pm | 2pm-<br>3pm | 3pm-<br>4pm | 4pm-<br>5pm | 5pm-<br>6pm | 6pm-<br>7pm | 7pm-<br>8pm | 8pm-<br>9pm | 9pm-<br>10pm | 10pm-<br>11pm |
|----------------|--------------|--------------|--------------|--------------|--------------|--------------|-------------|--------------|-------------|--------------|---------------|---------------|--------------|-------------|-------------|-------------|-------------|-------------|-------------|-------------|-------------|--------------|---------------|
| 1am-<br>2 am   | 1            | -            | -            | -            | -            | -            | -           | -            | -           | -            | -             | -             | -            | -           | -           | -           | -           | -           | -           | -           | -           | -            | -             |
| 2am-<br>3 am   | 1            | 1            | -            | -            | -            | -            | -           | -            | -           | -            | -             | -             | -            | -           | -           | -           | -           | -           | -           | -           | -           | -            | -             |
| 3am-<br>4 am   | 1            | 1            | 1            | -            | -            | -            | -           | -            | -           | -            | -             | -             | -            | -           | -           | -           | -           | -           | -           | -           | -           | -            | -             |
| 4am-<br>5 am   | 1            | 1            | 1            | 1            | -            | -            | -           | -            | -           | -            | -             | -             | -            | -           | -           | -           | -           | -           | -           | -           | -           | -            | -             |
| 5am-<br>6 am   | 1            | 1            | 1            | 1            | 1            | -            | -           | -            | -           | -            | -             | -             | -            | -           | -           | -           | -           | -           | -           | -           | -           | -            | -             |
| 6am-<br>7 am   | 1            | 1            | 1            | 1            | 1            | 1            | -           | -            | -           | -            | -             | -             | -            | -           | -           | -           | -           | -           | -           | -           | -           | -            | -             |
| 7am-<br>8 am   | 0.02         | 0            | 0            | 0.02         | 1            | 0.2          | 0.4         | -            | -           | -            | -             | -             | -            | -           | -           | -           | -           | -           | -           | -           | -           | -            | -             |
| 8am-<br>9 am   | 0.19         | 0            | 0            | 0.19         | 1            | 1            | 1           | 1            | -           | -            | -             | -             | -            | -           | -           | -           | -           | -           | -           | -           | -           | -            | -             |
| 9am-<br>10 am  | 1            | 1            | 1            | 1            | 1            | 1            | 1           | 0            | 0           | -            | -             | -             | -            | -           | -           | -           | -           | -           | -           | -           | -           | -            | -             |
| 10am-<br>11 am | 1            | 1            | 1            | 1            | 1            | 1            | 1           | 0.01         | 0.06        | 1            | -             | -             | -            | -           | -           | -           | -           | -           | -           | -           | -           | -            | -             |
| 11am-<br>12 am | 1            | 1            | 1            | 1            | 1            | 1            | 1           | 1            | 1           | 1            | -             | -             | -            | -           | -           | -           | -           | -           | -           | -           | -           | -            | -             |
| 12am-<br>1pm   | 1            | 1            | 1            | 1            | 1            | 1            | 1           | 0.24         | 1           | 1            | 1             | -             | -            | -           | -           | -           | -           | -           | -           | -           | -           | -            | -             |
| 1pm-<br>2pm    | 1            | 1            | 1            | 1            | 1            | 1            | 1           | 0.2          | 1           | 1            | 1             | 1             | -            | -           | -           | -           | -           | -           | -           | -           | -           | -            | -             |
| 2pm-<br>3pm    | 1            | 1            | 1            | 1            | 1            | 1            | 1           | 1            | 1           | 1            | 1             | 1             | 1            | 1           | -           | -           | -           | -           | -           | -           | -           | -            | -             |
| 3pm-<br>4pm    | 1            | 1            | 1            | 1            | 1            | 1            | 1           | 1            | 1           | 1            | 1             | 1             | 1            | 1           | 1           | -           | -           | -           | -           | -           | -           | -            | -             |
| 4pm-<br>5pm    | 1            | 1            | 1            | 1            | 1            | 1            | 1           | 1            | 1           | 1            | 1             | 1             | 1            | 1           | 1           | 1           | -           | -           | -           | -           | -           | -            | -             |
| 5pm-<br>6pm    | 1            | 1            | 1            | 1            | 1            | 1            | 1           | 0            | 0.01        | 1            | 1             | 0.76          | 1            | 1           | 1           | 1           | 1           | -           | -           | -           | -           | -            | -             |
| 6pm-<br>7pm    | 1            | 1            | 1            | 1            | 1            | 1            | 1           | 1            | 1           | 1            | 1             | 1             | 1            | 1           | 1           | 1           | 1           | 0.44        | -           | -           | -           | -            | -             |
| 7pm-<br>8pm    | 0.01         | 0            | 0            | 0.01         | 0.82         | 0.05         | 0.14        | 1            | 1           | 0            | 0.01          | 1             | 0.12         | 0.08        | 0.55        | 1           | 1           | 0           | 1           | -           | -           | -            | -             |
| 8pm-<br>9pm    | 1            | 0.02         | 0.04         | 1            | 1            | 1            | 1           | 1            | 1           | 0.05         | 0.67          | 1             | 1            | 1           | 1           | 1           | 1           | 0.04        | 1           | 1           | -           | -            | -             |
| 9pm-<br>10pm   | 1            | 0.01         | 0.01         | 1            | 1            | 1            | 1           | 1            | 1           | 0.02         | 0.84          | 1             | 1            | 1           | 1           | 1           | 1           | 0.05        | 1           | 1           | 1           | -            | -             |
| 10pm-<br>11pm  | 0.04         | 0            | 0            | 0.04         | 1            | 0.12         | 0.19        | 1            | 1           | 0            | 0.03          | 1             | 0.27         | 0.19        | 0.96        | 1           | 1           | 0           | 1           | 1           | 1           | 1            | -             |
| 11pm-<br>12pm  | 1            | 1            | 1            | 1            | 1            | 1            | 1           | 0.1          | 0.7         | 1            | 1             | 1             | 1            | 1           | 1           | 1           | 1           | 1           | 1           | 0.03        | 1           | 1            | 0.13          |

Table S.4: p-values from multiple comparisons between different days of the numbers of cliques with more than six horses in hourly networks. Significant differences (p < 0.05) are marked blue.

|       | 06-02 | 06-03 | 06-04 | 06-05 | 06-06 | 06-07 | 06-08 | 06-09 | 06-10 | 06-11 | 06-12 | 06-13 | 06-14 | 06-15 | 06-16 | 06-17 | 06-18 | 06-19 | 06-20 | 06-21 | 06-22 | 06-23 | 06-24 | 06-25 | 06-26 | 06-27 | 06-28 | 06-29 | 06-30 | 07-01 | 07-02 |   |   |
|-------|-------|-------|-------|-------|-------|-------|-------|-------|-------|-------|-------|-------|-------|-------|-------|-------|-------|-------|-------|-------|-------|-------|-------|-------|-------|-------|-------|-------|-------|-------|-------|---|---|
| 06-03 | 1     | -     | -     | -     | -     | -     | -     | -     | -     | -     | -     | -     | -     | -     | -     | -     | -     | -     | -     | -     | -     | -     | -     | -     | -     | -     | -     | -     | -     | -     | -     | - |   |
| 06-04 | 1     | 1     | -     | -     | -     | -     | -     | -     | -     | -     | -     | -     | -     | -     | -     | -     | -     | -     | -     | -     | -     | -     | -     | -     | -     | -     | -     | -     | -     | -     | -     | - |   |
| 06-05 | 1     | 1     | 1     | -     | -     | -     | -     | -     | -     | -     | -     | -     | -     | -     | -     | -     | -     | -     | -     | -     | -     | -     | -     | -     | -     | -     | -     | -     | -     | -     | -     | - |   |
| 06-06 | 1     | 1     | 1     | 1     | -     | -     | -     | -     | -     | -     | -     | -     | -     | -     | -     | -     | -     | -     | -     | -     | -     | -     | -     | -     | -     | -     | -     | -     | -     | -     | -     | - |   |
| 06-07 | 1     | 1     | 1     | 1     | 1     | -     | -     | -     | -     | -     | -     | -     | -     | -     | -     | -     | -     | -     | -     | -     | -     | -     | -     | -     | -     | -     | -     | -     | -     | -     | -     | - |   |
| 06-08 | 1     | 1     | 1     | 1     | 1     | 1     | -     | -     | -     | -     | -     | -     | -     | -     | -     | -     | -     | -     | -     | -     | -     | -     | -     | -     | -     | -     | -     | -     | -     | -     | -     | - |   |
| 06-09 | 1     | 1     | 1     | 1     | 1     | 1     | 1     | -     | -     | -     | -     | -     | -     | -     | -     | -     | -     | -     | -     | -     | -     | -     | -     | -     | -     | -     | -     | -     | -     | -     | -     | - |   |
| 06-10 | 1     | 1     | 1     | 1     | 1     | 1     | 1     | 1     | -     | -     | -     | -     | -     | -     | -     | -     | -     | -     | -     | -     | -     | -     | -     | -     | -     | -     | -     | -     | -     | -     | -     | - |   |
| 06-11 | 1     | 1     | 1     | 1     | 1     | 1     | 1     | 1     | 1     | -     | -     | -     | -     | -     | -     | -     | -     | -     | -     | -     | -     | -     | -     | -     | -     | -     | -     | -     | -     | -     | -     | - |   |
| 06-12 | 1     | 1     | 1     | 1     | 1     | 1     | 1     | 1     | 1     | 1     | -     | -     | -     | -     | -     | -     | -     | -     | -     | -     | -     | -     | -     | -     | -     | -     | -     | -     | -     | -     | -     | - |   |
| 06-13 | 1     | 1     | 1     | 1     | 1     | 1     | 1     | 1     | 1     | 1     | 1     | -     | -     | -     | -     | -     | -     | -     | -     | -     | -     | -     | -     | -     | -     | -     | -     | -     | -     | -     | -     | - |   |
| 06-14 | 1     | 1     | 1     | 1     | 1     | 1     | 1     | 1     | 1     | 1     | 1     | 1     | -     | -     | -     | -     | -     | -     | -     | -     | -     | -     | -     | -     | -     | -     | -     | -     | -     | -     | -     | - |   |
| 06-15 | 1     | 1     | 1     | 1     | 1     | 1     | 1     | 1     | 1     | 1     | 1     | 1     | 1     | -     | -     | -     | -     | -     | -     | -     | -     | -     | -     | -     | -     | -     | -     | -     | -     | -     | -     | - |   |
| 06-16 | 0     | 0     | 0     | 0     | 1     | 0.03  | 0.05  | 0.01  | 1     | 1     | 0.15  | 1     | 0.01  | 0     | -     | -     | -     | -     | -     | -     | -     | -     | -     | -     | -     | -     | -     | -     | -     | -     | -     | - |   |
| 06-17 | 0     | 0     | 0     | 0     | 1     | 0.15  | 0.19  | 0.03  | 1     | 1     | 0.71  | 1     | 0.02  | 0     | 1     | -     | -     | -     | -     | -     | -     | -     | -     | -     | -     | -     | -     | -     | -     | -     | -     | - |   |
| 06-18 | 1     | 1     | 1     | 1     | 1     | 1     | 1     | 1     | 1     | 1     | 1     | 1     | 1     | 1     | 0.03  | 0.06  | -     | -     | -     | -     | -     | -     | -     | -     | -     | -     | -     | -     | -     | -     | -     | - |   |
| 06-19 | 0     | 0     | 0     | 0     | 1     | 0.13  | 0.07  | 0.06  | 1     | 1     | 1     | 1     | 0.01  | 0     | 1     | 1     | 0.03  | -     | -     | -     | -     | -     | -     | -     | -     | -     | -     | -     | -     | -     | -     | - | - |
| 06-20 | 0.54  | 0.14  | 0.19  | 0.79  | 1     | 1     | 1     | 1     | 1     | 1     | 1     | 1     | 1     | 1     | 1     | 1     | 1     | 1     | 1     | -     | -     | -     | -     | -     | -     | -     | -     | -     | -     | -     | -     | - |   |
| 06-21 | 1     | 1     | 1     | 1     | 1     | 1     | 1     | 1     | 1     | 1     | 1     | 1     | 1     | 1     | 0.19  | 0.64  | 1     | 0.82  | 1     | -     | -     | -     | -     | -     | -     | -     | -     | -     | -     | -     | -     | - |   |
| 06-22 | 0.15  | 0.02  | 0.03  | 0.09  | 1     | 1     | 1     | 1     | 1     | 1     | 1     | 1     | 0.26  | 0.21  | 1     | 1     | 1     | 1     | 1     | 1     | 1     | -     | -     | -     | -     | -     | -     | -     | -     | -     | -     | - |   |
| 06-23 | 0     | 0     | 0     | 0.01  | 1     | 0.69  | 0.52  | 0.09  | 1     | 1     | 1     | 1     | 0.12  | 0.01  | 1     | 1     | 0.27  | 1     | 1     | 1     | 1     | -     | -     | -     | -     | -     | -     | -     | -     | -     | -     | - |   |
| 06-24 | 1     | 1     | 1     | 1     | 1     | 1     | 1     | 1     | 1     | 1     | 1     | 1     | 1     | 1     | 0.08  | 0.28  | 1     | 0.1   | 1     | 1     | 1     | 1     | -     | -     | -     | -     | -     | -     | -     | -     | -     | - |   |
| 06-25 | 0.01  | 0     | 0     | 0.01  | 1     | 0.64  | 0.29  | 0.19  | 1     | 1     | 1     | 1     | 0.08  | 0.02  | 1     | 1     | 0.22  | 1     | 1     | 1     | 1     | 1     | 0.36  | -     | -     | -     | -     | -     | -     | -     | -     | - |   |
| 06-26 | 0.09  | 0.03  | 0.03  | 0.12  | 1     | 1     | 1     | 1     | 1     | 1     | 1     | 1     | 0.48  | 0.26  | 1     | 1     | 1     | 1     | 1     | 1     | 1     | 1     | 1     | 1     | 1     | -     | -     | -     | -     | -     | -     | - |   |
| 06-27 | 1     | 1     | 1     | 1     | 1     | 1     | 1     | 1     | 1     | 1     | 1     | 1     | 1     | 1     | 0     | 0     | 1     | 0     | 0.25  | 1     | 0.03  | 0     | 1     | 0     | 0.04  | -     | -     | -     | -     | -     | -     | - |   |
| 06-28 | 1     | 0.19  | 0.15  | 1     | 1     | 1     | 1     | 1     | 1     | 1     | 1     | 1     | 1     | 1     | 1     | 1     | 1     | 1     | 1     | 1     | 1     | 1     | 1     | 1     | 1     | 1     | 0.36  | -     | -     | -     | -     | - |   |
| 06-29 | 0.32  | 0.17  | 0.16  | 0.31  | 1     | 1     | 1     | 1     | 1     | 1     | 1     | 1     | 0.52  | 0.69  | 1     | 1     | 1     | 1     | 1     | 1     | 1     | 1     | 1     | 1     | 1     | 1     | 0.19  | 1     | -     | -     | -     | - |   |
| 06-30 | 1     | 1     | 1     | 1     | 1     | 1     | 1     | 1     | 1     | 1     | 1     | 1     | 1     | 1     | 0     | 0     | 1     | 0     | 0.37  | 1     | 0.06  | 0     | 1     | 0     | 0.06  | 1     | 0.88  | 0.36  | -     | -     | -     | - |   |
| 07-01 | 0.01  | 0     | 0     | 0.01  | 1     | 0.37  | 0.64  | 0.12  | 1     | 1     | 1     | 1     | 0.03  | 0.02  | 1     | 1     | 0.18  | 1     | 1     | 1     | 1     | 1     | 0.71  | 1     | 1     | 0     | 1     | 1     | 0     | 1     | -     | - |   |
| 07-02 | 0.12  | 0.02  | 0.02  | 0.07  | 1     | 1     | 1     | 0.82  | 1     | 1     | 1     | 1     | 0.14  | 0.16  | 1     | 1     | 0.41  | 1     | 1     | 1     | 1     | 1     | 1     | 1     | 1     | 1     | 0.03  | 1     | 1     | 0.08  | 1     | - |   |
| 07-03 | 1     | 1     | 1     | 1     | 1     | 1     | 1     | 1     | 1     | 1     | 1     | 1     | 1     | 1     | 0     | 0     | 1     | 0     | 0.19  | 1     | 0.03  | 0     | 1     | 0     | 0.02  | 1     | 0.24  | 0.1   | 1     | 0     | 0.02  |   |   |

Table S.5: p-values from multiple comparisons between different days of the sizes of the largest cliques in hourly networks. Significant differences ( $p < 0.05$ ) are marked blue.

|       | 06-02 | 06-03 | 06-04 | 06-05 | 06-06 | 06-07 | 06-08 | 06-09 | 06-10 | 06-11 | 06-12 | 06-13 | 06-14 | 06-15 | 06-16 | 06-17 | 06-18 | 06-19 | 06-20 | 06-21 | 06-22 | 06-23 | 06-24 | 06-25 | 06-26 | 06-27 | 06-28 | 06-29 | 06-30 | 07-01 | 07-02 |  |
|-------|-------|-------|-------|-------|-------|-------|-------|-------|-------|-------|-------|-------|-------|-------|-------|-------|-------|-------|-------|-------|-------|-------|-------|-------|-------|-------|-------|-------|-------|-------|-------|--|
| 06-03 | 1     |       |       |       |       |       |       |       |       |       |       |       |       |       |       |       |       |       |       |       |       |       |       |       |       |       |       |       |       |       |       |  |
| 06-04 |       | 1     |       |       |       |       |       |       |       |       |       |       |       |       |       |       |       |       |       |       |       |       |       |       |       |       |       |       |       |       |       |  |
| 06-05 |       |       | 1     |       |       |       |       |       |       |       |       |       |       |       |       |       |       |       |       |       |       |       |       |       |       |       |       |       |       |       |       |  |
| 06-06 |       |       |       | 1     |       |       |       |       |       |       |       |       |       |       |       |       |       |       |       |       |       |       |       |       |       |       |       |       |       |       |       |  |
| 06-07 |       |       |       |       | 1     |       |       |       |       |       |       |       |       |       |       |       |       |       |       |       |       |       |       |       |       |       |       |       |       |       |       |  |
| 06-08 |       |       |       |       |       | 1     |       |       |       |       |       |       |       |       |       |       |       |       |       |       |       |       |       |       |       |       |       |       |       |       |       |  |
| 06-09 |       |       |       |       |       |       | 1     |       |       |       |       |       |       |       |       |       |       |       |       |       |       |       |       |       |       |       |       |       |       |       |       |  |
| 06-10 |       |       |       |       |       |       |       | 1     |       |       |       |       |       |       |       |       |       |       |       |       |       |       |       |       |       |       |       |       |       |       |       |  |
| 06-11 |       |       |       |       |       |       |       |       | 1     |       |       |       |       |       |       |       |       |       |       |       |       |       |       |       |       |       |       |       |       |       |       |  |
| 06-12 |       |       |       |       |       |       |       |       |       | 1     |       |       |       |       |       |       |       |       |       |       |       |       |       |       |       |       |       |       |       |       |       |  |
| 06-13 |       |       |       |       |       |       |       |       |       |       | 1     |       |       |       |       |       |       |       |       |       |       |       |       |       |       |       |       |       |       |       |       |  |
| 06-14 |       |       |       |       |       |       |       |       |       |       |       | 1     |       |       |       |       |       |       |       |       |       |       |       |       |       |       |       |       |       |       |       |  |
| 06-15 |       |       |       |       |       |       |       |       |       |       |       |       | 1     |       |       |       |       |       |       |       |       |       |       |       |       |       |       |       |       |       |       |  |
| 06-16 | 0.08  |       | 0.44  | 0.33  | 1     | 1     | 1     | 1     | 1     | 1     | 1     | 1     | 0.08  | 0.39  | -     | -     | -     | -     | -     | -     | -     | -     | -     | -     | -     | -     | -     | -     | -     | -     | -     |  |
| 06-17 |       | 1     | 1     | 1     | 1     | 1     | 1     | 1     | 1     | 1     | 1     | 1     | 1     | 1     | 1     | 1     | -     | -     | -     | -     | -     | -     | -     | -     | -     | -     | -     | -     | -     | -     | -     |  |
| 06-18 |       |       | 1     | 1     | 1     | 1     | 1     | 1     | 1     | 1     | 1     | 1     | 1     | 1     | 1     | 1     | 1     | -     | -     | -     | -     | -     | -     | -     | -     | -     | -     | -     | -     | -     | -     |  |
| 06-19 | 0.11  | 1     | 0.42  | 0.32  | 1     | 1     | 1     | 1     | 1     | 1     | 1     | 1     | 0.1   | 0.39  | 1     | 1     | 1     | -     | -     | -     | -     | -     | -     | -     | -     | -     | -     | -     | -     | -     | -     |  |
| 06-20 |       | 1     | 1     | 1     | 1     | 1     | 1     | 1     | 1     | 1     | 1     | 1     | 1     | 1     | 1     | 1     | 1     | 1     | -     | -     | -     | -     | -     | -     | -     | -     | -     | -     | -     | -     | -     |  |
| 06-21 |       |       | 1     | 1     | 1     | 1     | 1     | 1     | 1     | 1     | 1     | 1     | 1     | 1     | 1     | 1     | 1     | 1     | 1     | -     | -     | -     | -     | -     | -     | -     | -     | -     | -     | -     | -     |  |
| 06-22 |       |       |       | 1     | 1     | 1     | 1     | 1     | 1     | 1     | 1     | 1     | 1     | 1     | 1     | 1     | 1     | 1     | 1     | 1     | 1     | -     | -     | -     | -     | -     | -     | -     | -     | -     | -     |  |
| 06-23 |       |       |       |       | 1     | 1     | 1     | 1     | 1     | 1     | 1     | 1     | 1     | 1     | 1     | 1     | 1     | 1     | 1     | 1     | 1     | 1     | -     | -     | -     | -     | -     | -     | -     | -     | -     |  |
| 06-24 |       |       |       |       |       | 1     | 1     | 1     | 1     | 1     | 1     | 1     | 1     | 1     | 1     | 1     | 1     | 1     | 1     | 1     | 1     | 1     | 1     | -     | -     | -     | -     | -     | -     | -     | -     |  |
| 06-25 |       |       |       |       |       |       | 1     | 1     | 1     | 1     | 1     | 1     | 1     | 1     | 1     | 1     | 1     | 1     | 1     | 1     | 1     | 1     | 1     | 1     | -     | -     | -     | -     | -     | -     | -     |  |
| 06-26 |       |       |       |       |       |       |       | 1     | 1     | 1     | 1     | 1     | 1     | 1     | 1     | 1     | 1     | 1     | 1     | 1     | 1     | 1     | 1     | 1     | 1     | -     | -     | -     | -     | -     | -     |  |
| 06-27 |       |       |       |       |       |       |       |       | 1     | 1     | 1     | 1     | 1     | 1     | 0.33  | 1     | 1     | 0.39  | 1     | 1     | 1     | 1     | 1     | 1     | 1     | 1     | -     | -     | -     | -     | -     |  |
| 06-28 | 0.17  | 1     | 0.93  | 0.61  | 1     | 1     | 1     | 1     | 1     | 1     | 1     | 1     | 0.17  | 0.96  | 1     | 1     | 1     | 1     | 1     | 1     | 1     | 1     | 1     | 1     | 1     | 1     | 0.68  | -     | -     | -     | -     |  |
| 06-29 | 0.33  | 1     | 1     | 1     | 1     | 1     | 1     | 1     | 1     | 1     | 1     | 1     | 0.31  | 0.73  | 1     | 1     | 1     | 1     | 1     | 1     | 1     | 1     | 1     | 1     | 1     | 1     | 0.9   | 1     | -     | -     | -     |  |
| 06-30 |       | 1     | 1     | 1     | 1     | 1     | 1     | 1     | 1     | 1     | 1     | 1     | 1     | 1     | 1     | 1     | 1     | 1     | 1     | 1     | 1     | 1     | 1     | 1     | 1     | 1     | 1     | 1     | 1     | -     | -     |  |
| 07-01 | 0.01  | 1     | 0.05  | 0.03  | 1     | 0.22  | 0.42  | 0.51  | 1     | 1     | 1     | 1     | 0.02  | 0.06  | 1     | 1     | 1     | 1     | 1     | 0.37  | 1     | 1     | 0.37  | 1     | 1     | 1     | 0.04  | 1     | 1     | 0.25  | -     |  |
| 07-02 | 0.06  | 1     | 0.13  | 0.18  | 1     | 0.98  | 1     | 1     | 1     | 1     | 1     | 1     | 0.07  | 0.08  | 1     | 1     | 1     | 1     | 1     | 1     | 1     | 1     | 1     | 1     | 1     | 1     | 0.11  | 1     | 1     | 0.66  | 1     |  |
| 07-03 | 1     | 1     | 1     | 1     | 1     | 1     | 1     | 1     | 1     | 1     | 1     | 1     | 1     | 1     | 1     | 1     | 1     | 1     | 1     | 1     | 1     | 1     | 1     | 1     | 1     | 1     | 1     | 1     | 1     | 1     | 0.2   |  |

### S.3 Density and diameter

In addition to the plots presented in Figure 7 in the main article which illustrate density and diameter grouped by hours, Figures S.5 and S.6 depict density and diameter grouped by days. The underlying contact networks are based on one hour aggregation windows. The red diamonds mark the means and the red bars represent the mean  $\pm$  standard deviation.

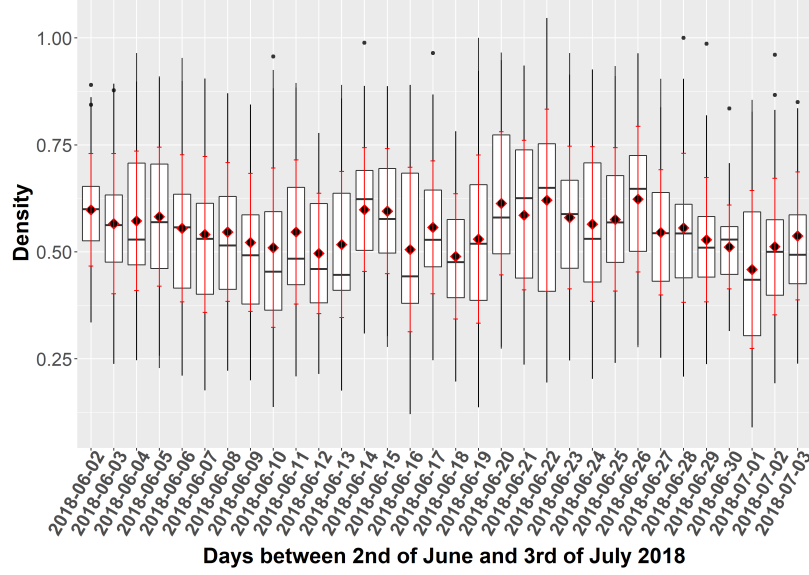

Figure S.5: Boxplot of the density values grouped by days.

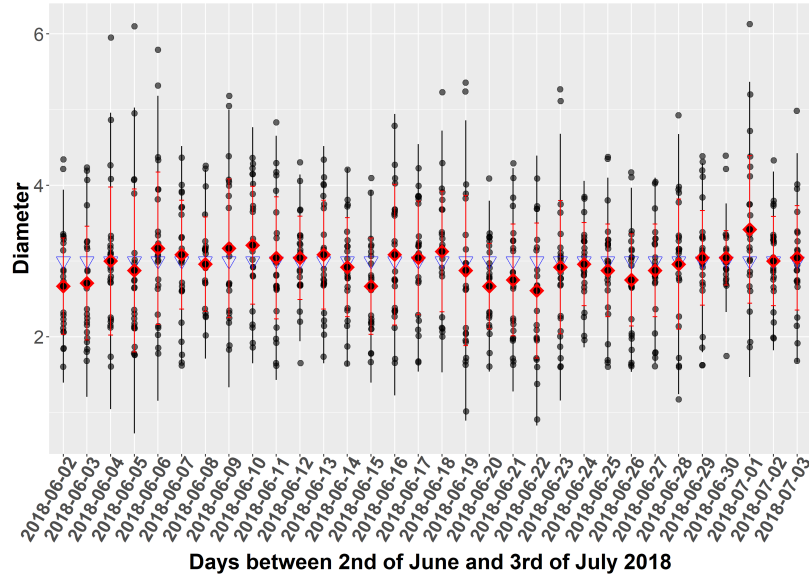

Figure S.6: Pointplot of the diameter values grouped by days. The blue triangles mark the medians. A 1.5% jitter was allowed to avoid overplotting of points.

Figures S.7 and S.8 presents the course of density and diameter of the hourly networks, respectively. Tables S.6 and S.7 present p-values from multiple comparisons between different hours of density, respectively, diameter values. Significant differences ( $p < 0.05$ ) are marked blue. For multiple comparisons a Bonferroni correction was applied.

Grouping after days had no significant effect on the density or diameter of the hourly networks.



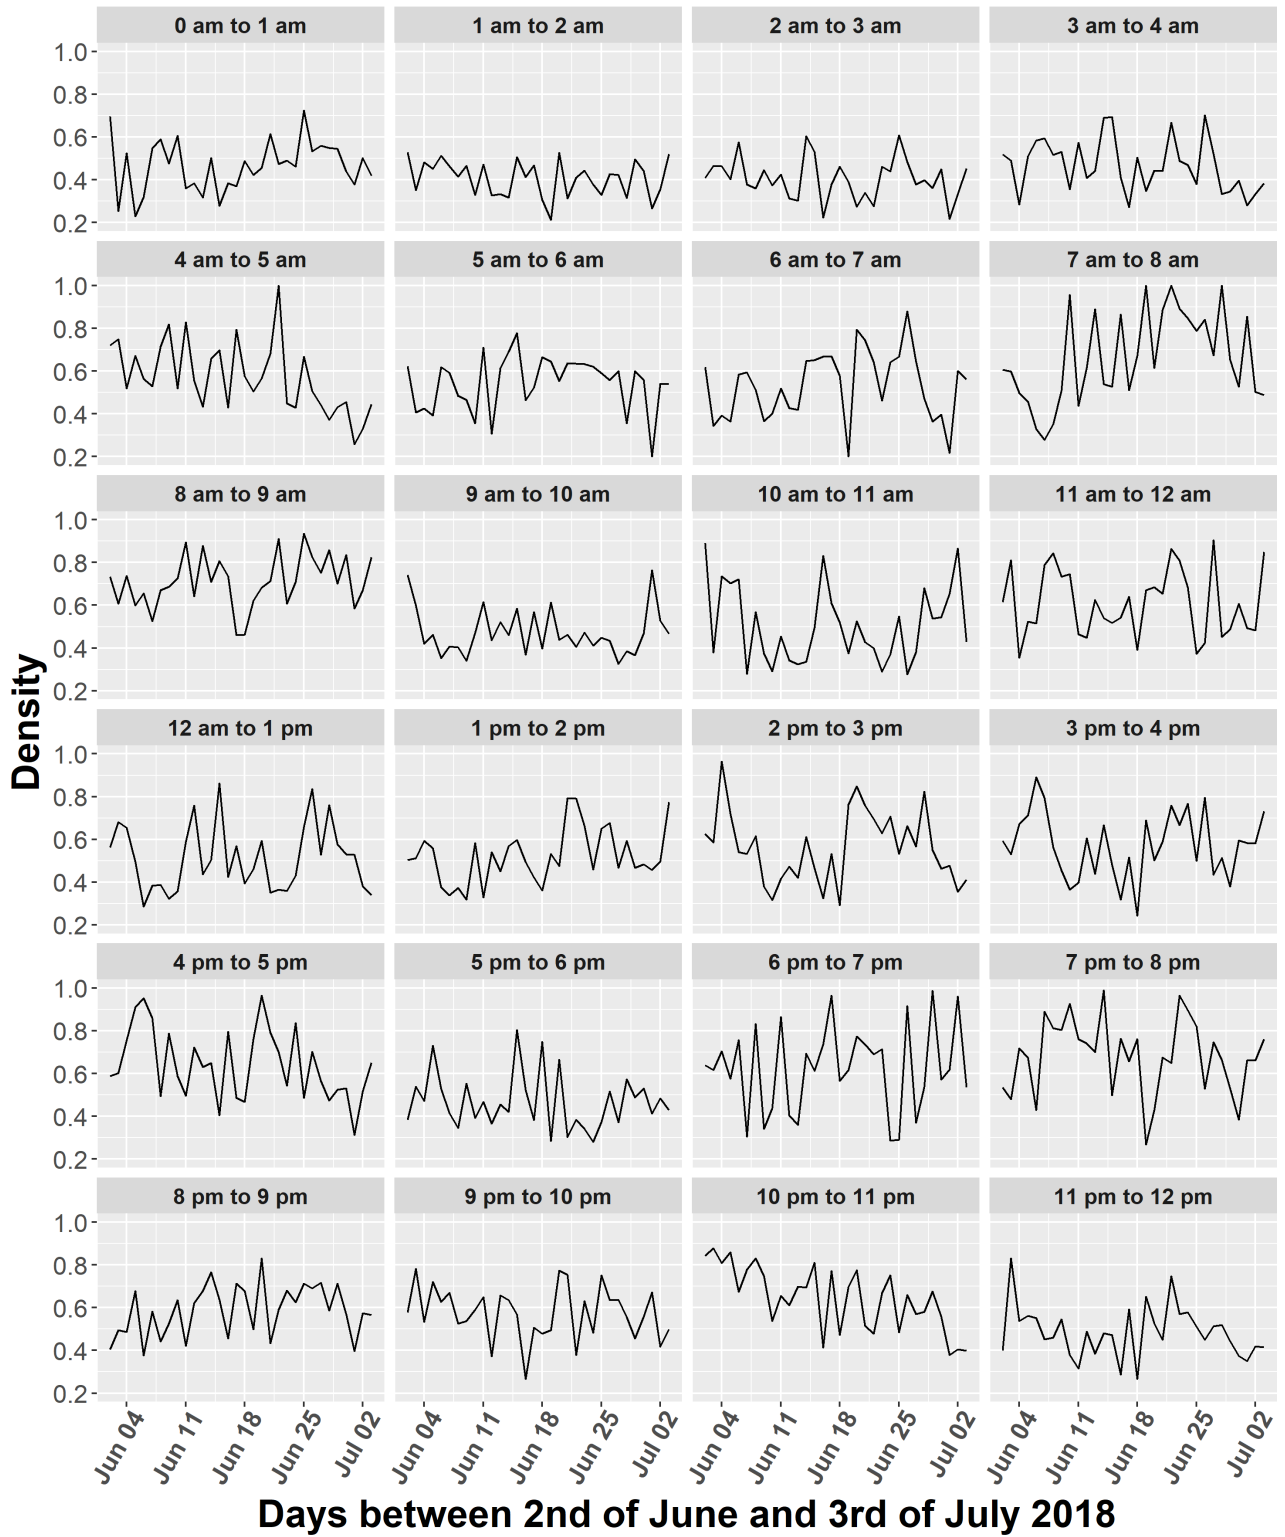

Figure S.7: Density values of hourly networks.

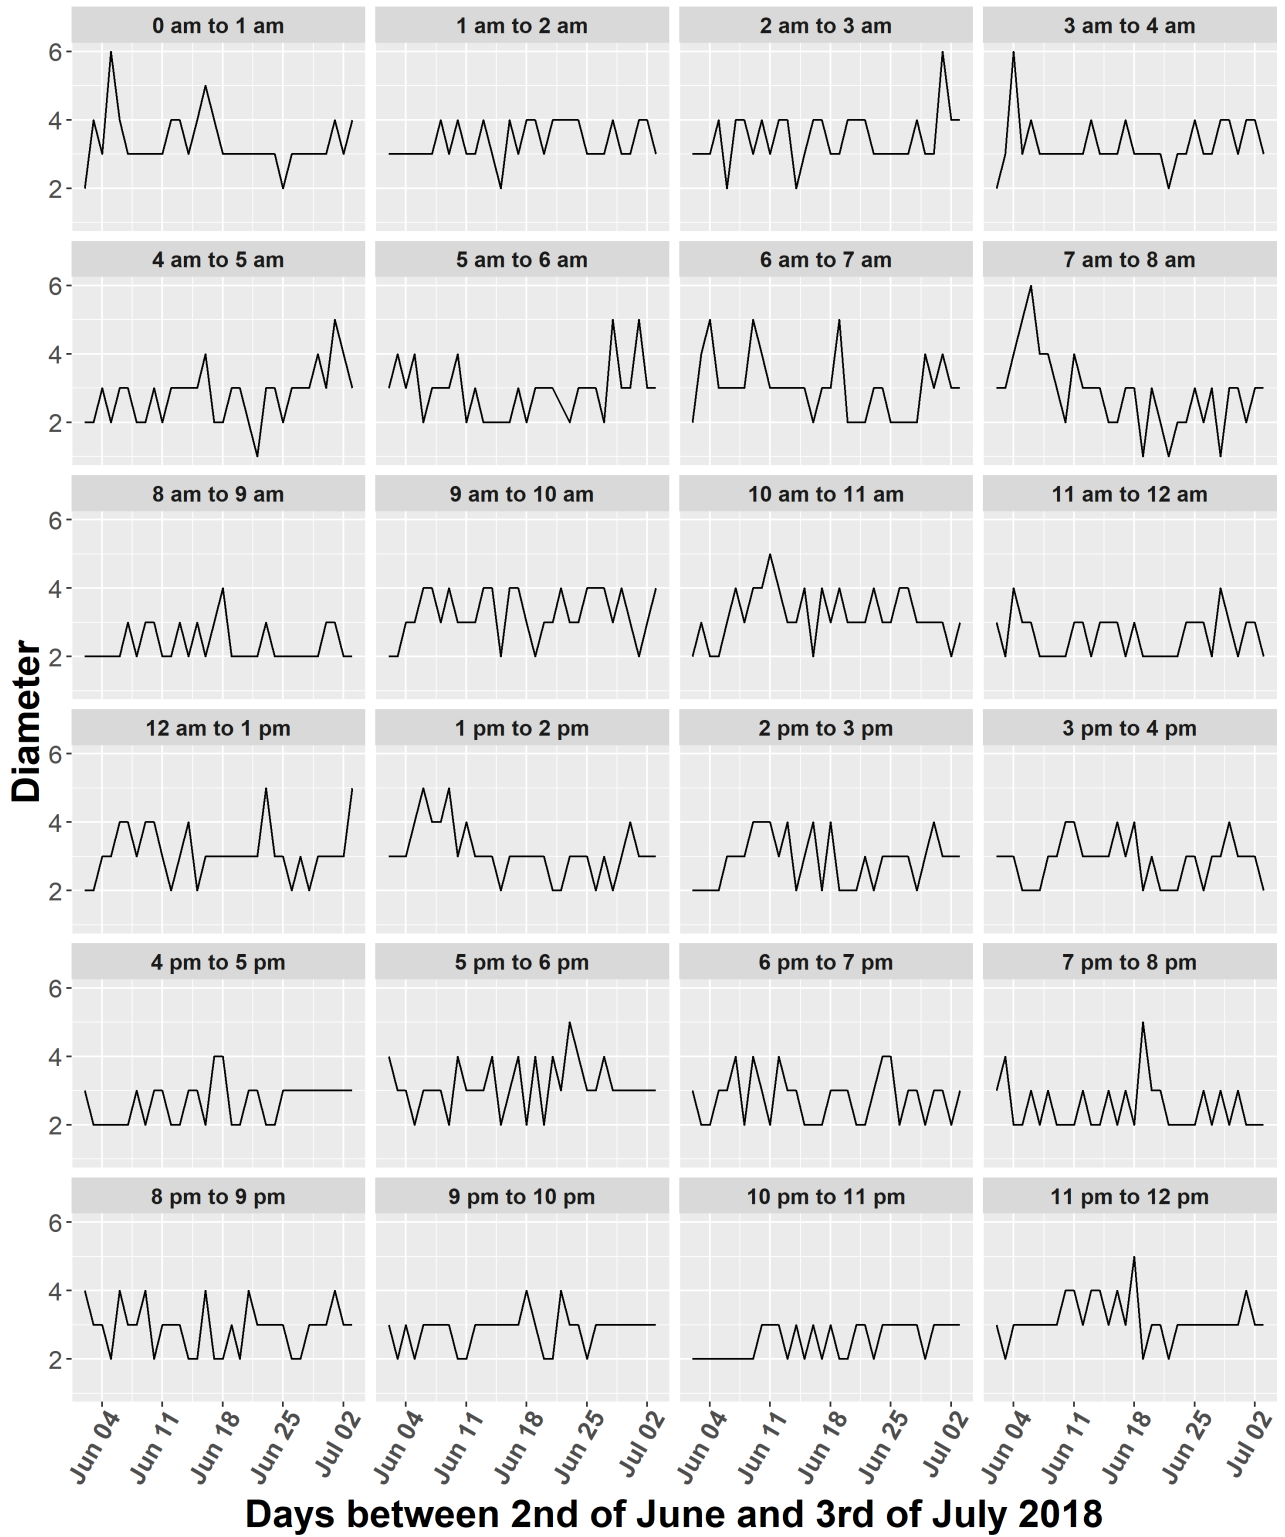

Figure S.8: Diameter values of hourly networks.

Table S.6: p-values from multiple comparisons between density values of different hours. Significant differences ( $p < 0.05$ ) are marked blue.

|           | 0am-1am | 1am-2am | 2am-3am | 3am-4am | 4am-5am | 5am-6am | 6am-7am | 7am-8am | 8am-9am | 9am-10am | 10am-11am | 11am-12am | 12am-1pm | 1pm-2pm | 2pm-3pm | 3pm-4pm | 4pm-5pm | 5pm-6pm | 6pm-7pm | 7pm-8pm | 8pm-9pm | 9pm-10pm | 10pm-11pm |
|-----------|---------|---------|---------|---------|---------|---------|---------|---------|---------|----------|-----------|-----------|----------|---------|---------|---------|---------|---------|---------|---------|---------|----------|-----------|
| 1am-2am   | 1       | -       | -       | -       | -       | -       | -       | -       | -       | -        | -         | -         | -        | -       | -       | -       | -       | -       | -       | -       | -       | -        | -         |
| 2am-3am   | 1       | 1       | -       | -       | -       | -       | -       | -       | -       | -        | -         | -         | -        | -       | -       | -       | -       | -       | -       | -       | -       | -        | -         |
| 3am-4am   | 1       | 1       | 1       | -       | -       | -       | -       | -       | -       | -        | -         | -         | -        | -       | -       | -       | -       | -       | -       | -       | -       | -        | -         |
| 4am-5am   | 1       | 0.01    | 0.01    | 1       | -       | -       | -       | -       | -       | -        | -         | -         | -        | -       | -       | -       | -       | -       | -       | -       | -       | -        | -         |
| 5am-6am   | 1       | 0       | 0.01    | 1       | 1       | -       | -       | -       | -       | -        | -         | -         | -        | -       | -       | -       | -       | -       | -       | -       | -       | -        | -         |
| 6am-7am   | 1       | 0.18    | 0.22    | 1       | 1       | 1       | -       | -       | -       | -        | -         | -         | -        | -       | -       | -       | -       | -       | -       | -       | -       | -        | -         |
| 7am-8am   | 0.04    | 0       | 0       | 0.05    | 1       | 1       | 1       | -       | -       | -        | -         | -         | -        | -       | -       | -       | -       | -       | -       | -       | -       | -        | -         |
| 8am-9am   | 0       | 0       | 0       | 0       | 0.09    | 0       | 0       | 1       | -       | -        | -         | -         | -        | -       | -       | -       | -       | -       | -       | -       | -       | -        | -         |
| 9am-10am  | 1       | 1       | 1       | 1       | 1       | 1       | 1       | 0.02    | 0       | -        | -         | -         | -        | -       | -       | -       | -       | -       | -       | -       | -       | -        | -         |
| 10am-11am | 1       | 1       | 1       | 1       | 1       | 1       | 1       | 0       | 0       | 1        | -         | -         | -        | -       | -       | -       | -       | -       | -       | -       | -       | -        | -         |
| 11am-12am | 0.15    | 0       | 0       | 0.14    | 1       | 1       | 1       | 1       | 1       | 0.04     | 1         | -         | -        | -       | -       | -       | -       | -       | -       | -       | -       | -        | -         |
| 12am-1pm  | 1       | 1       | 1       | 1       | 1       | 1       | 1       | 1       | 0       | 1        | 1         | 1         | -        | -       | -       | -       | -       | -       | -       | -       | -       | -        | -         |
| 1pm-2pm   | 1       | 0.03    | 0.05    | 1       | 1       | 1       | 1       | 1       | 0       | 1        | 1         | 1         | 1        | -       | -       | -       | -       | -       | -       | -       | -       | -        | -         |
| 2pm-3pm   | 1       | 0.01    | 0.01    | 1       | 1       | 1       | 1       | 1       | 0.07    | 1        | 1         | 1         | 1        | 1       | -       | -       | -       | -       | -       | -       | -       | -        | -         |
| 3pm-4pm   | 1       | 0       | 0       | 1       | 1       | 1       | 1       | 1       | 0.08    | 1        | 1         | 1         | 1        | 1       | 1       | -       | -       | -       | -       | -       | -       | -        | -         |
| 4pm-5pm   | 0.01    | 0       | 0       | 0.01    | 1       | 1       | 1       | 1       | 1       | 0        | 0.73      | 1         | 0.88     | 0.81    | 1       | 1       | -       | -       | -       | -       | -       | -        | -         |
| 5pm-6pm   | 1       | 1       | 1       | 1       | 1       | 1       | 1       | 0.03    | 0       | 1        | 1         | 0.12      | 1        | 1       | 1       | 0.96    | 0       | -       | -       | -       | -       | -        | -         |
| 6pm-7pm   | 0.14    | 0       | 0       | 0.21    | 1       | 1       | 1       | 1       | 1       | 0.56     | 1         | 1         | 1        | 1       | 1       | 1       | 1       | 0.29    | -       | -       | -       | -        | -         |
| 7pm-8pm   | 0       | 0       | 0       | 0       | 1       | 0.14    | 0.1     | 1       | 1       | 0        | 0.1       | 1         | 0.06     | 0.08    | 1       | 1       | 1       | 0       | 1       | -       | -       | -        | -         |
| 8pm-9pm   | 0.08    | 0       | 0       | 0.14    | 1       | 1       | 1       | 1       | 0.05    | 0.06     | 1         | 1         | 1        | 1       | 1       | 1       | 1       | 0.06    | 1       | 1       | -       | -        | -         |
| 9pm-10pm  | 0.15    | 0       | 0       | 0.34    | 1       | 1       | 1       | 1       | 0.03    | 0.06     | 1         | 1         | 1        | 1       | 1       | 1       | 1       | 0.15    | 1       | 1       | 1       | -        | -         |
| 10pm-11pm | 0       | 0       | 0       | 0       | 1       | 1       | 1       | 1       | 1       | 0        | 0.3       | 1         | 0.25     | 0.26    | 1       | 1       | 1       | 0       | 1       | 1       | 1       | 1        | -         |
| 11pm-12pm | 1       | 1       | 1       | 1       | 1       | 1       | 1       | 0.11    | 0       | 1        | 1         | 0.5       | 1        | 1       | 1       | 1       | 0.02    | 1       | 0.61    | 0       | 0.32    | 0.76     | 0.01      |

Table S.7: p-values from multiple comparisons between diameter values of different hours. Significant differences ( $p < 0.05$ ) are marked blue.

|           | 0am-1am | 1am-2am | 2am-3am | 3am-4am | 4am-5am | 5am-6am | 6am-7am | 7am-8am | 8am-9am | 9am-10am | 10am-11am | 11am-12am | 12am-1pm | 1pm-2pm | 2pm-3pm | 3pm-4pm | 4pm-5pm | 5pm-6pm | 6pm-7pm | 7pm-8pm | 8pm-9pm | 9pm-10pm | 10pm-11pm |
|-----------|---------|---------|---------|---------|---------|---------|---------|---------|---------|----------|-----------|-----------|----------|---------|---------|---------|---------|---------|---------|---------|---------|----------|-----------|
| 1am-2am   | 1       | -       | -       | -       | -       | -       | -       | -       | -       | -        | -         | -         | -        | -       | -       | -       | -       | -       | -       | -       | -       | -        | -         |
| 2am-3am   | 1       | 1       | -       | -       | -       | -       | -       | -       | -       | -        | -         | -         | -        | -       | -       | -       | -       | -       | -       | -       | -       | -        | -         |
| 3am-4am   | 1       | 1       | 1       | -       | -       | -       | -       | -       | -       | -        | -         | -         | -        | -       | -       | -       | -       | -       | -       | -       | -       | -        | -         |
| 4am-5am   | 1       | 0.19    | 0.15    | 1       | -       | -       | -       | -       | -       | -        | -         | -         | -        | -       | -       | -       | -       | -       | -       | -       | -       | -        | -         |
| 5am-6am   | 1       | 1       | 1       | 1       | 1       | -       | -       | -       | -       | -        | -         | -         | -        | -       | -       | -       | -       | -       | -       | -       | -       | -        | -         |
| 6am-7am   | 1       | 1       | 1       | 1       | 1       | 1       | -       | -       | -       | -        | -         | -         | -        | -       | -       | -       | -       | -       | -       | -       | -       | -        | -         |
| 7am-8am   | 1       | 1       | 0.99    | 1       | 1       | 1       | 1       | -       | -       | -        | -         | -         | -        | -       | -       | -       | -       | -       | -       | -       | -       | -        | -         |
| 8am-9am   | 0       | 0       | 0       | 0       | 1       | 0.34    | 0.16    | 1       | -       | -        | -         | -         | -        | -       | -       | -       | -       | -       | -       | -       | -       | -        | -         |
| 9am-10am  | 1       | 1       | 1       | 1       | 1       | 1       | 1       | 1       | 0       | -        | -         | -         | -        | -       | -       | -       | -       | -       | -       | -       | -       | -        | -         |
| 10am-11am | 1       | 1       | 1       | 1       | 1       | 1       | 1       | 1       | 0       | 1        | -         | -         | -        | -       | -       | -       | -       | -       | -       | -       | -       | -        | -         |
| 11am-12am | 0.02    | 0       | 0       | 0.04    | 1       | 1       | 1       | 1       | 1       | 0.12     | 0.26      | -         | -        | -       | -       | -       | -       | -       | -       | -       | -       | -        | -         |
| 12am-1pm  | 1       | 1       | 1       | 1       | 1       | 1       | 1       | 1       | 0.01    | 1        | 1         | 1         | -        | -       | -       | -       | -       | -       | -       | -       | -       | -        | -         |
| 1pm-2pm   | 1       | 1       | 1       | 1       | 1       | 1       | 1       | 1       | 0       | 1        | 1         | 1         | 1        | -       | -       | -       | -       | -       | -       | -       | -       | -        | -         |
| 2pm-3pm   | 1       | 1       | 1       | 1       | 1       | 1       | 1       | 1       | 0.81    | 1        | 1         | 1         | 1        | 1       | -       | -       | -       | -       | -       | -       | -       | -        | -         |
| 3pm-4pm   | 1       | 0.74    | 0.51    | 1       | 1       | 1       | 1       | 1       | 0.27    | 1        | 1         | 1         | 1        | 1       | 1       | -       | -       | -       | -       | -       | -       | -        | -         |
| 4pm-5pm   | 0.07    | 0.01    | 0.01    | 0.11    | 1       | 1       | 1       | 1       | 1       | 0.31     | 0.68      | 1         | 1        | 1       | 1       | 1       | -       | -       | -       | -       | -       | -        | -         |
| 5pm-6pm   | 1       | 1       | 1       | 1       | 1       | 1       | 1       | 1       | 0       | 1        | 1         | 0.54      | 1        | 1       | 1       | 1       | 1       | -       | -       | -       | -       | -        | -         |
| 6pm-7pm   | 1       | 0.22    | 0.17    | 1       | 1       | 1       | 1       | 1       | 1       | 1        | 1         | 1         | 1        | 1       | 1       | 1       | 1       | 1       | -       | -       | -       | -        | -         |
| 7pm-8pm   | 0       | 0       | 0       | 0       | 1       | 1       | 1       | 1       | 1       | 0.02     | 0.04      | 1         | 0.26     | 0.11    | 1       | 1       | 1       | 0.07    | 1       | -       | -       | -        | -         |
| 8pm-9pm   | 1       | 1       | 1       | 1       | 1       | 1       | 1       | 1       | 0.22    | 1        | 1         | 1         | 1        | 1       | 1       | 1       | 1       | 1       | 1       | 1       | -       | -        | -         |
| 9pm-10pm  | 1       | 0.09    | 0.08    | 1       | 1       | 1       | 1       | 1       | 0.09    | 1        | 1         | 1         | 1        | 1       | 1       | 1       | 1       | 1       | 1       | 1       | 1       | -        | -         |
| 10pm-11pm | 0       | 0       | 0       | 0       | 1       | 1       | 1       | 1       | 1       | 0.02     | 0.05      | 1         | 0.58     | 0.23    | 1       | 1       | 1       | 0.11    | 1       | 1       | 1       | 1        | -         |
| 11pm-12pm | 1       | 1       | 1       | 1       | 1       | 1       | 1       | 1       | 0       | 1        | 1         | 0.2       | 1        | 1       | 1       | 1       | 0.62    | 1       | 1       | 0.02    | 1       | 1        | 0.03      |
